# Supplementary material for: Exploring the dynamics in experts' participation in a multi-hazards multi-phases emergency management system using textual analysis assisted by large language models
Source: Research Square preprint supplement (doi:10.21203/rs.3.rs-6789882/v1), 2025-07-25
Supplement: Supplementary file 1 [file b1c7e51721abe2024801328e.docx]

**Appendix A – Filtering Criteria**

To ensure that selected articles aligned with the research objectives, we applied a three-layered filtering strategy. Each article was required to contain:

1. At least one keyword related to an emergency type;
2. At least one term indicating a professional identity;
3. At least one keyword denoting an emergency or crisis context.

The full keyword list is presented in Table A1.

Table A1. Keyword Groups Used in the Three-layered Filtering Strategy

| Filtering Dimension | Category | Example Keywords (at least one required) |
| --- | --- | --- |
| Emergency Type | Natural Disasters | natural disasters, hydrological and meteorological disasters, meteorological disasters, earthquake-related disasters, geological disasters, marine disasters, biological disasters, flooding, river flood, drought, urban waterlogging, drought conditions, typhoons, hurricanes, torrential rainfall, heavy snow, hailstorm, sandstorm, extreme heat, cold wave, earthquake, landslide, debris flow, forest fire, grassland fire, wildfire, tornado, freezing conditions, storm surge |
| Industrial Disasters | industrial disasters, safety incidents, transportation accidents, public infrastructure failures, equipment failures, environmental pollution incidents, ecological damage events, mining accidents, explosions, fires, electrical accidents, occupational injuries, production accidents, chemical accidents, operational accidents, traffic accidents, shipwrecks, aviation accidents, highway accidents, subway accidents, derailments, bridge collapses, building collapses, power outages, gas leaks, pipeline ruptures, water supply interruptions, power supply failures, gas supply incidents |
| Public Health Emergencies | public health emergencies, infectious disease outbreaks, diseases of unknown etiology, food safety incidents, occupational hazards, public health incidents, incidents affecting life safety, viral outbreaks, epidemic outbreaks, epidemic prevention and control, cluster outbreaks, cluster infections |
| Social Security Emergencies | terrorist attacks, economic security incidents, foreign-related emergencies, bombing attacks, terrorism, kidnapping, hostage incidents, violent assaults, extremists, terrorists, terrorist activities, petition-related incidents, social conflicts, mass incidents, financial fraud scandals |
| Professional Identity | – | expert, scholar, advisor, technician, researcher, professor, think tank, consulting agency, university, academic institution, scientific personnel |
| Crisis Context | – | emergency, sudden incident |

**Appendix B. Prompt for Expert Participation Scenario Extraction (Prompt 0)**

This prompt was designed to extract condensed meaning units from news articles containing large amounts of notices. It serves as a preliminary step for developing the coding scheme.

Textbox B1.Prompt 0

| You are a news classification model. Your task is to extract expert participation scenarios from news articles to support the analysis of expert participation in public emergency management.  **Definition:**  An expert participation scenario refers to an instance in which experts are involved in the emergency management process of a public emergency by government agencies or public organizations. The related concepts are defined as:  **1. Public Emergencies:** Natural disasters, industrial disasters, public health emergencies, and social security emergencies.  **2. Experts:** Individuals with professional knowledge or technical expertise, such as industry experts, scholars, and technical personnel.  **3. Emergency Management:** Refers to the processes of prevention, monitoring, response, and recovery related to public emergencies.  **Rules:**  • If the news article contains a scenario containing public emergency management and experts' participation, extract the scenario and generate a concise description with no more than 50 Chinese characters. If the article does not meet the requirements, return "NA".  **Extraction Requirements:**  • The type of public emergency must be selected from the following categories: natural disasters, industrial disasters, public health emergencies, or social security emergencies.  • Descriptions must be specific and limited to 50 characters or fewer.  • Return None in the following cases:  • The article does not mention a public emergency.  • The article does not describe expert participation scenario.  **Input and Output Format:**  • Input: News article text  • Output:  • If the article contains valid expert participation scenarios:  Public Emergency Type: {One of the four categories}  Expert Participation Scenario 1: {description}  Expert Participation Scenario 2: {description}  Expert Participation Scenario 3: {description} |
| --- |

**Appendix C. Prompt for Generating the Coding Scheme (Prompt1)**

This prompt was used to instruct the LLM to generate a coding scheme based on the news articles. The scheme should define a set of categories and corresponding sub-categories to support the structured classifications of expert participation in emergency management.

Textbox C1. Prompt 1

| You are provided with original news texts in Excel format. Your task is to generate a coding scheme for structured content analysis.   1. **Coding Categories: Include but are not limited to the following.**   • **Emergency Types:** Must include and be limited to the following four sub-categories — Natural Disasters, Industrial Safety Disasters, Public Health Emergencies, Social Security Emergencies.  • **Emergency Management Stages:** Must include the following four sub-categories — Prevention and Preparedness, Surveillance and Warning, Response and Rescue, Recovery and Learning.  • **Expert Participation Functions:** The sub-categories are generated based on the contents of the news text.  • **Other Extractable Categories:** These must be extracted strictly based on the news content and be relevant to the research topic "Expert Participation Patterns in Emergency Management in China." For example, administrative division, expert identities, or other clearly defined information. For each category, a classification scheme must be clearly defined and listed separately.   1. **Output Format Requirements:**   The generated coding scheme must be output in plain text format and contain only category names and classification criteria, as shown below:   1. **Emergency Types:** Natural Disasters, Industrial Safety Disasters, Public Health Emergencies, Social Security Emergencies   (2) **Emergency Management Stages:** Prevention and Preparedness, Surveillance and Warning, Response and Rescue, Recovery and Learning  (3) **Expert Roles:** Dynamically generated categories  (4) **Jurisdictional Levels:** Provincial, Municipal, County  (5) **Expert Identities:** Academic Expert, Industry Expert, Government Official, Other  (6) **Other Extractable Category 1**: Category name and classification scheme based on analysis of the news content  (7) **Other Extractable Category 2**: Category name and classification scheme based on analysis of the news content  ...   1. **Special Instructions:**   • Emphasize the dynamic nature of "Other Extractable Categories," which must be proposed based on the actual contents of the news.  • Ensure that the extracted categories have analytical value and provide appropriate classification schemes.  • The dynamically generated categories should complement and enrich the existing analytical framework.  • All categories should focus on expert participation and be related to the role of experts or the impact of emergencies.  The goal is to output a coding scheme in plain text format, containing category names, categories under each category including the category names and the detailed descriptions of each category, to support subsequent formal coding tasks. |
| --- |

**Appendix D. Prompt for Structured Content Annotation (Prompt2)**

This prompt guided the LLM in performing structured annotation of expert participation in public emergency management.

Textbox D1.Prompt 2

| You are a professional text classification assistant. Please annotate the news article according to the following rules.  **Step 1: Determine whether expert participation is present**   1. Determine whether the text describes a public emergency or emergency management in China, and whether an expert is involved. If so, extract only the content related to expert participation and disregard all unrelated information. 2. If there is no expert participation, directly return NA and end the response.   **Step 2: Based on the extracted content, classify according to the following six criteria. Select only one most appropriate label for each:**   1. **Emergency Types** (The type of emergency event in which the expert participated):   • Natural Disasters (e.g., earthquake, typhoon, flood, landslide, rainstorm, mudslide, forest fire)  • Industrial Safety Disasters (e.g., traffic accident, mine collapse, fire, chemical leakage, building collapse)  • Public Health Emergencies (e.g., epidemic outbreak, infectious disease control, food or drug safety, mass poisoning)  • Social Security Emergencies (e.g., terrorist attack, mass violence, major criminal incident)  • None (if the expert was not involved in any emergency event)   1. **Emergency Management Stages** (The stage of emergency response at which the expert intervened):   • Prevention and Preparedness (e.g., planning, risk assessment, contingency planning, training)  • Surveillance and Warning (e.g., risk surveillance, data analysis, issuing alerts)  • Response and Rescue (e.g., participating in emergency response or decision support)  • Recovery and Learning (e.g., post-event review, policy improvement, knowledge sharing)  • None (if the expert's role is not tied to a specific stage of emergency management)   1. **Expert Participation Functions** (The expert's concrete actions. If multiple actions are present, choose the one with the greatest impact on emergency management):   • Government Consultancy (the expert was invited by government or related organizations to provide guidance or answer specific questions)  • Scientific Advisory (the expert contributed analysis or recommendations based on professional knowledge)  • Decision Involvement (the expert directly participated in governmental decision-making or proposed response strategies)  • None (the expert made general comments but was not substantively involved)   1. **Jurisdictional Levels** (Clearly stated location(s) mentioned in the text, as detailed as possible):   • Format: Province + City (if available), e.g., "Jiangsu Province, Nanjing City"  • If multiple locations are mentioned, list all.  • If no location is mentioned, write "None".   1. **Expert Identities** (Determine based on the expert's background or affiliation):   • Academic Expert (e.g., professors or researchers at universities or research institutes)  • Industry Expert (e.g., practitioners with extensive hands-on experience in a specific business sector, such as technology, healthcare, or finance, often working in private companies, consultancies, or similar organizations)  • Government Official (e.g., officials or personnel from public agencies such as emergency departments or CDCs)  • Other (recognized as an expert by the media but does not belong to the above three categories)  • None (if the expert's identity is not mentioned)   1. **Scope of Impact** (Geographical scope of the emergency):   • Single Region (limited to a single provincial-level region)  • Multiple Regions(affecting multiple provinces, but not nationwide)  • Nationwide (affecting the entire country or triggering a national emergency response)  • None (if the event involving the expert is not a public emergency)  Example:  Input:  As of 10:00 a.m. on August 30, four specialized mine rescue teams from Sichuan and Yunnan provinces—comprising a total of 136 personnel—had arrived at the site of a gas explosion at the Xiaojiawan Coal Mine operated by Zhengjin Industrial and Trade Co., Ltd. in Panzhihua, Sichuan. On-site rescue operations were in progress, and seven additional rescue teams with 165 members were en route. In parallel, medical support was mobilized: Sichuan Provincial People's Hospital dispatched specialists in burns, intensive care, and respiratory medicine, while West China Hospital sent two burn experts. The composition of the medical team was designed to address the typical injuries from gas explosions—severe burns and airway trauma requiring ICU-level care. The accident occurred around 6:00 p.m. on August 29. In response, Sichuan authorities urgently deployed ten mine rescue units with 277 personnel. A 24-member rescue team from Yunnan also arrived to assist in the operation.  Output:  1. Emergency Types: Industrial Disasters  2. Emergency Management Stages: Response and Rescue  3. Expert Participation Functions: Participated in on-site rescue  4. Administrative Division: Sichuan Province, Panzhihua City  5. Expert Identities: Medical Expert  6. Scope of Impact: Multiple Provinces |
| --- |
